# Supplementary material for: Exploiting the Potential of Magnetic Nanoparticles for Rapid Diagnosis Tests (RDTs): Nanoparticle-Antibody Conjugates and Color Development Strategies
Source: MDPI journal article supplement (doi:10.3390/diagnostics13193033), 2023-09-23
Supplement: s1 [file s1]

Supplementary Material

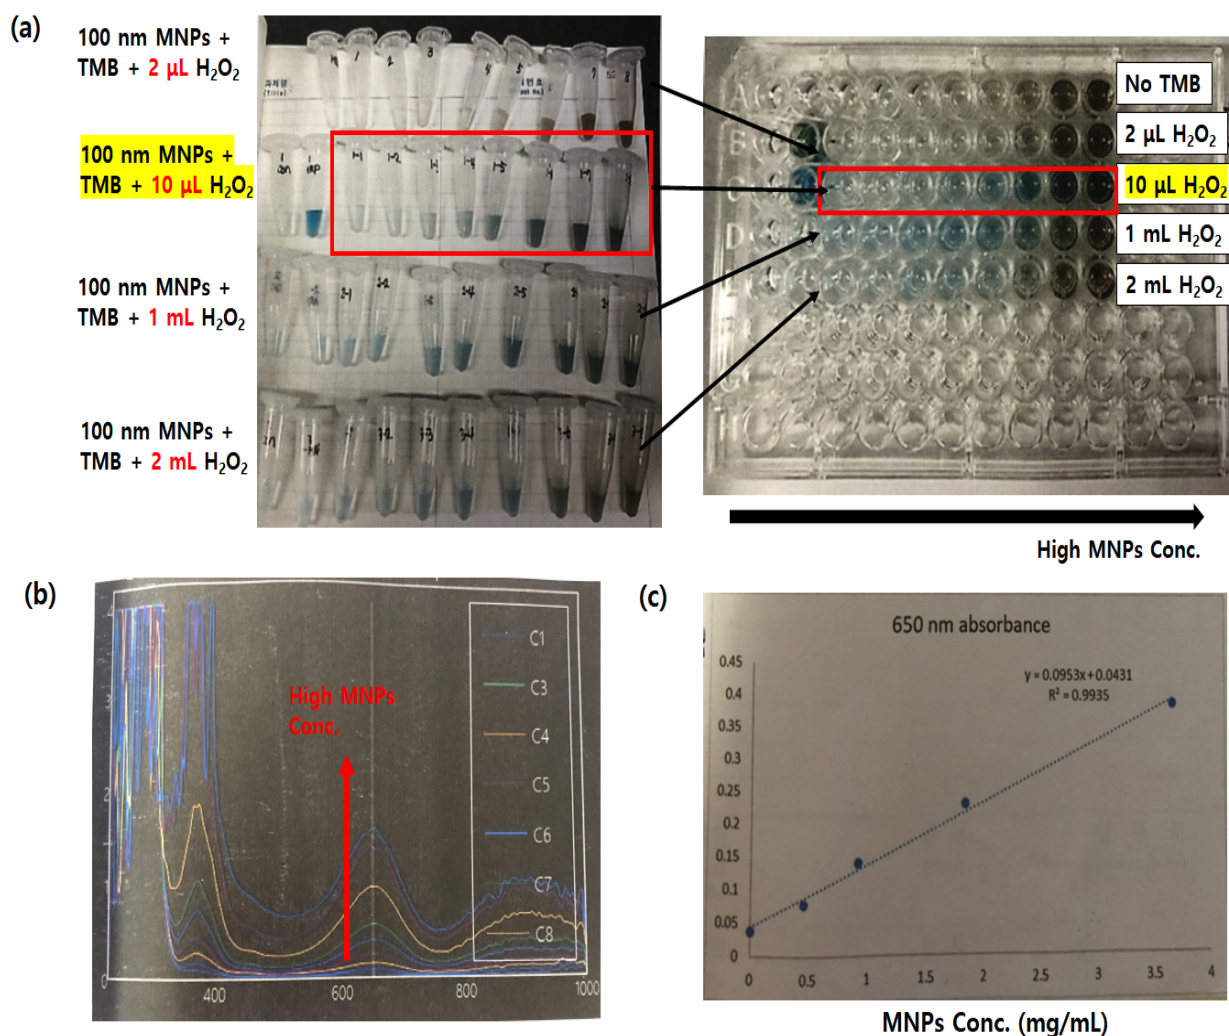

**Figure S1.** Implementation of color development utilizing the peroxidase-like activity of MNPs (a) Visualization of color development of MNPs under varying concentrations of  $H_2O_2$  (b) Increase in 650 nm absorbance with respect to the concentration of MNPs under optimized conditions (c) Linear increase in 650 nm absorbance with increasing concentration of MNPs within the range of 0–3.5  $mg\ mL^{-1}$  under optimized conditions.
